# Supplementary material for: Magnetic probe-based microrheology reveals local softening and stiffening of 3D collagen matrices by fibroblasts
Source: Biomed Microdevices. 2021 Apr 26;23(2):27. doi: 10.1007/s10544-021-00547-2 (PMC8076128; doi:10.1007/s10544-021-00547-2)
Supplement: Supplementary file 1 — Supplementary file1 (DOC 2.40MB) [file 10544_2021_547_MOESM1_ESM.pdf]

## SUPPLEMENTARY MATERIAL

### Magnetic-field gradient $\frac{\partial B}{\partial x}$ uniformity in radial direction

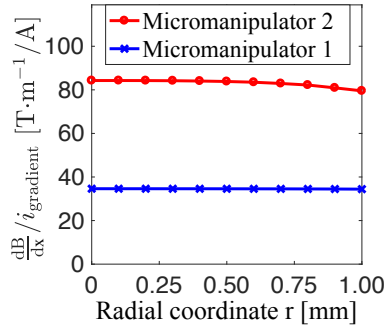

FIG. S1. Calibrated FEM simulation on magnetic-field gradient  $\frac{\partial B}{\partial x}$  dependence on radial position  $r$ , normalized by  $i_{\text{gradient}}$ . An axial coordinate of  $x=0$  is used.

### Accuracy of measurements using microprobes

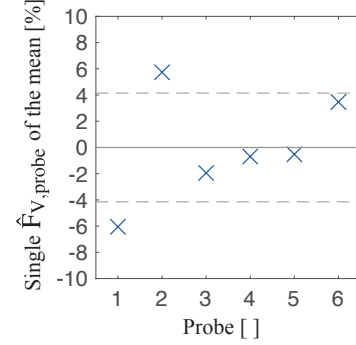

FIG. S3. Accuracy of single probe measurements. Solid line with 0% denotes for the mean value, while dashed line marks the SD.

### Magnetic field $B_x$ uniformity in axial and radial directions

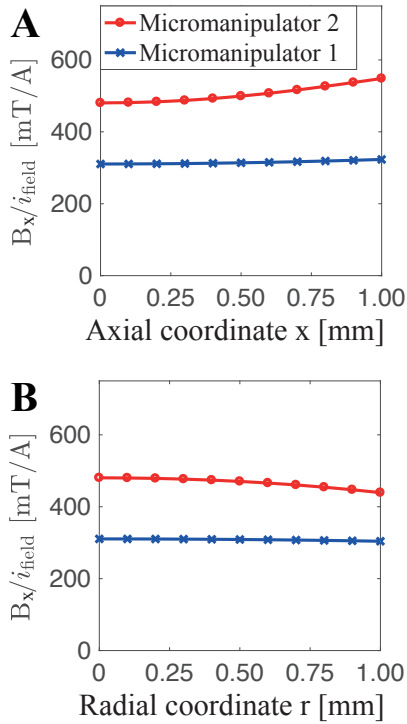

FIG. S2. Calibrated FEM simulation on magnetic field  $B_x$  dependence on (A) axial position  $x$  and (B) radial position  $r$ , both, normalized by  $i_{\text{field}}$ . (A) and (B) have a radial coordinate of  $r=0$ , and an axial coordinate of  $x=0$ , respectively.

### Force calibration of the micromanipulators 1–2

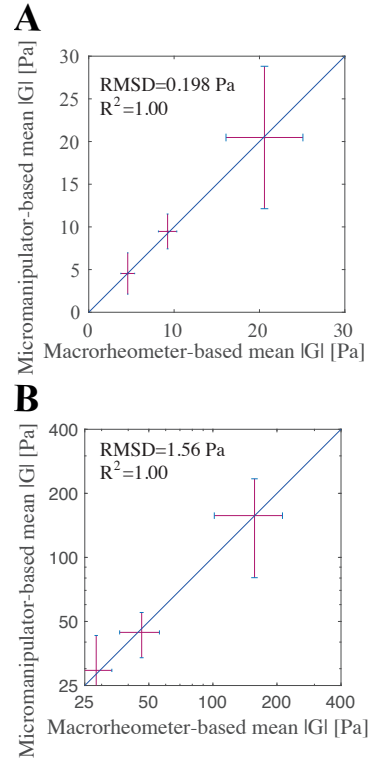

FIG. S4. Micromanipulator calibration against macrorheometry. (A) Micromanipulator 1 and (B) 2 compared against macrorheometer-based measurements, based on mean moduli  $|G|$ . Final volumetric force  $\hat{F}_{V,\text{probe}}$  conversion is based on the slope of 1.00 for the relationship (plotted). The errorbars show the measurement SDs.

## Viscoelasticity of collagen type 1 matrix

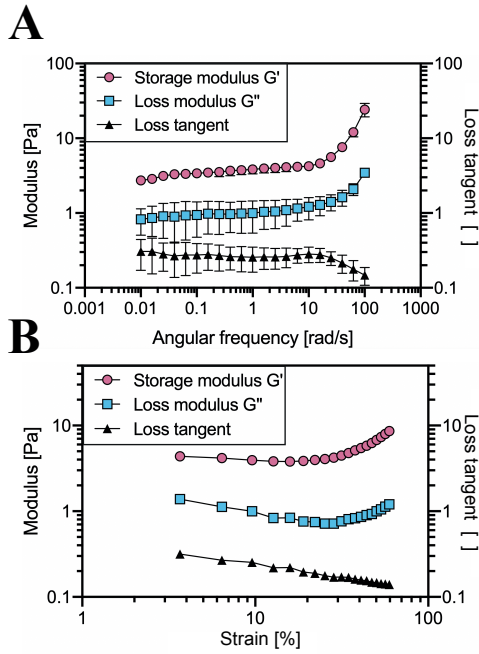

FIG. S5. Macrorheometer quantification of collagen type 1 at a concentration of  $c=1.0$  mg/mL.

(A) Frequency dependence of viscoelasticity at a strain of 1%. The means and SDs are based on 3 repetitions.

(B) Viscoelasticity versus strain at an angular frequency of 1 rad/s.

## Effect of initial fibroblast density on collagen matrix viscoelasticity at the incubation of T=32 h

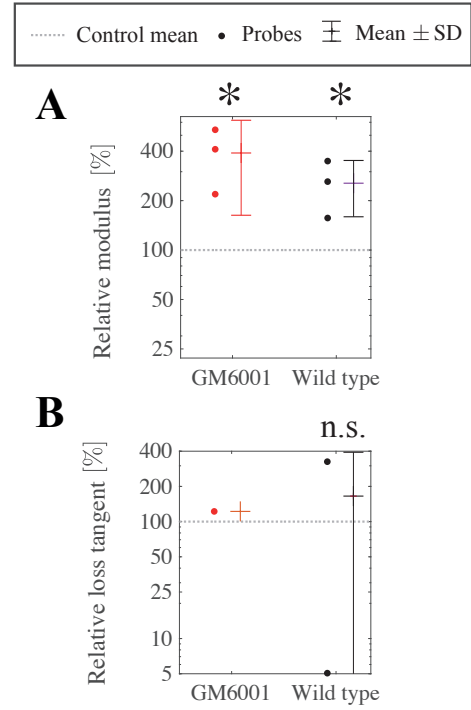

FIG. S7. Initial cell density affects on microscale viscoelasticity.

(A) Relative-modulus values of matrices with wild type and GM6001-treated cells are larger than the ones of the control at an increased initial fibroblast density of 2.0 M cells/mL (ie. both stiffer;  $*Pr < 0.05$ , paired t-test,  $n=3$ ). (B) Matrices' loss tangent insignificantly varies from the one of control matrices (n.s.  $Pr > 0.20$ ,  $n=2$  for wild type).

## Spatial variance of the collagen matrix viscoelasticity

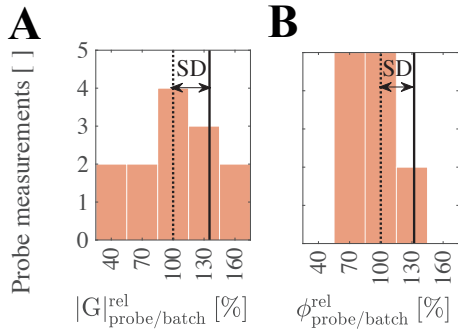

FIG. S6. Spatially varying viscoelastic properties at the microscale measured for collagen matrices at a concentration of  $c=1.0$  mg/mL:

(A) modulus-related  $|G|_{\text{probe/batch}}^{\text{rel}}$  and (B) loss tangent-related  $\phi_{\text{probe/batch}}^{\text{rel}}$ . The SDs illustrate the spatially varying properties.
